# Supplementary material for: A Survey of Emergency Medicine Residents’ Use of Educational Podcasts
Source: PubMed Central journal article supplement (PMC5305130; doi:10.5811/westjem.2016.12.32850), 2017-01-30
Supplement: wjem-18-229-s002.pdf [file wjem-18-229-s002.pdf]

Appendix B: What EM podcasts do you regularly listen to? n=356

| Podcast                                  | N   | %      |
|------------------------------------------|-----|--------|
| EM:RAP                                   | 277 | 77.81% |
| EMCrit                                   | 221 | 62.08% |
| EM Basic                                 | 104 | 29.21% |
| ERCast                                   | 80  | 22.47% |
| FOAMcast                                 | 64  | 17.98% |
| SMART EM                                 | 58  | 16.29% |
| REBEL EM                                 | 55  | 15.45% |
| Academic Life in EM Podcast              | 43  | 12.08% |
| Emergency ECG of the week                | 42  | 11.80% |
| The Skeptics Guide to Emergency Medicine | 39  | 10.96% |
| Annals of Emergency Medicine             | 36  | 10.11% |
| CORE EM                                  | 30  | 8.43%  |
| SMACC Podcast                            | 24  | 6.74%  |
| RAGE Podcast                             | 20  | 5.62%  |
| NA                                       | 20  | 5.62%  |
| EMcast                                   | 19  | 5.34%  |
| emergency ultrasound podcast             | 19  | 5.34%  |
| Hippo EM Resident Call Room              | 19  | 5.34%  |
| Wildcast EM                              | 15  | 4.21%  |
| EMMedHome                                | 14  | 3.93%  |
| Tox Talk                                 | 13  | 3.65%  |
| PEM ED                                   | 11  | 3.09%  |
| Free Emergency Medicine Talks            | 9   | 2.53%  |
| Other                                    | 8   | 2.25%  |

|                                           |   |       |
|-------------------------------------------|---|-------|
| EM PEM                                    | 7 | 1.97% |
| The EM Res Podcast                        | 7 | 1.97% |
| The St. Emlyn's Virtual Hospital Podcast  | 7 | 1.97% |
| HEFT EMCast                               | 6 | 1.69% |
| Intensive Care Network                    | 5 | 1.40% |
| PEM Playbook                              | 4 | 1.12% |
| PHARM: Prehospital and Retrieval Medicine | 4 | 1.12% |
| EMJ club                                  | 3 | 0.84% |
| iTeachEM                                  | 2 | 0.56% |
| Broome Docs                               | 1 | 0.28% |
| Emergency medicine cases                  | 0 | 0.00% |
| Emergency Medicine Ireland                | 0 | 0.00% |
| Everyday Medicine                         | 0 | 0.00% |
